# Supplementary material
Source: Springer Nature journal article supplement (https://www.springermedizin.de/resource/supplementary/12875_2006_225_MOESM5_ESM.pdf/9436542)

Number of bursary and writing grant recipients (total n=35)

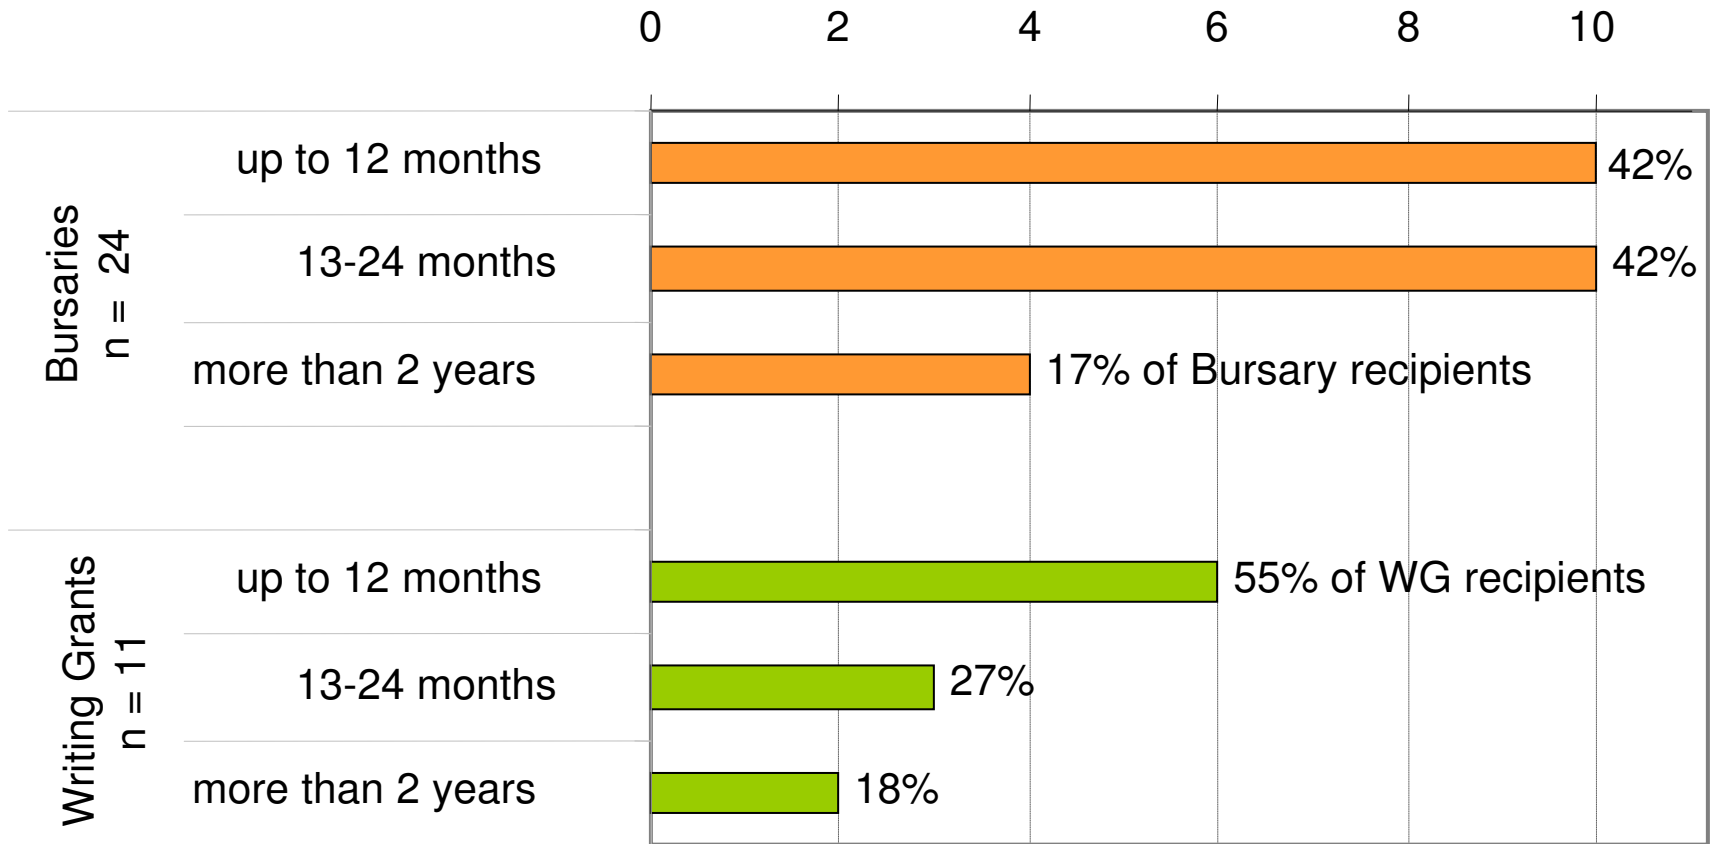

Supplement: MOESM5 [file 9436542]
